# Supplementary material for: Knowledge, Perception, and Willingness towards Immunization among Bangladeshi Population during COVID-19 Vaccine Rolling Period
Source: Vaccines (Basel). 2021 Dec 7;9(12):1449. doi: 10.3390/vaccines9121449 (PMC8706921; doi:10.3390/vaccines9121449)
Supplement: Supplementary file 1 [file vaccines-09-01449-s001.zip › vaccines-1427422-supplementary.pdf]

# Knowledge, Perception, and Willingness towards Immunization among Bangladeshi Population during COVID-19 Vaccine Rolling Period

Md. Sazzadul Bari, Md. Jamal Hossain, Foyez Ahmmed, Md. Mokelsur Rahman Sarker, Labony Khandokar, Aperajita Paul Chaithy, Farina Aziz, Saikat Mitra, Talha Bin Emran, Md. Saiful Islam, Md. Rabiul Islam and Isa Naina Mohamed

**Table S1.** Questions presented to the participants through Google Form in order to evaluate their knowledge, perception and willingness towards COVID-19 vaccination.

|                                                                                                                                                                                             |     |      |      |
|---------------------------------------------------------------------------------------------------------------------------------------------------------------------------------------------|-----|------|------|
| K1: Do you know that COVID-19 vaccine has been approved by World Health Organization (WHO)?                                                                                                 | Yes | 1083 | 94.7 |
|                                                                                                                                                                                             | No  | 61   | 5.3  |
| K2: Do you know that vaccination against COVID-19 has been started in Bangladesh?                                                                                                           | Yes | 1130 | 98.8 |
|                                                                                                                                                                                             | No  | 14   | 1.2  |
| K3: Do you know that government is providing free COVID-19 vaccination for the mass population?                                                                                             | Yes | 1068 | 93.4 |
|                                                                                                                                                                                             | No  | 76   | 6.6  |
| K4: Have you seen any government-initiated promotions to encourage COVID-19 vaccination?                                                                                                    | Yes | 835  | 73.0 |
|                                                                                                                                                                                             | No  | 309  | 27.0 |
| K5: Do you know that registration for COVID-19 vaccination can be performed online?                                                                                                         | Yes | 1072 | 93.7 |
|                                                                                                                                                                                             | No  | 72   | 6.3  |
| K6: Which country is supplying this vaccine to Bangladesh?                                                                                                                                  | Yes | 966  | 84.4 |
|                                                                                                                                                                                             | No  | 178  | 15.6 |
| K7: How many doses of Oxford COVID-19 vaccine is required for immunization?                                                                                                                 | Yes | 957  | 83.7 |
|                                                                                                                                                                                             | No  | 187  | 16.3 |
| K8: What is the percentage of efficacy of COVID-19 vaccine in developing immunization?                                                                                                      | Yes | 299  | 26.1 |
|                                                                                                                                                                                             | No  | 845  | 73.9 |
| P1: Do you think vaccination will help in controlling the COVID-19 situation?                                                                                                               | Yes | 855  | 74.7 |
|                                                                                                                                                                                             | No  | 289  | 25.3 |
| P2: Do you think that government should be the sole distributor of COVID-19 vaccine?                                                                                                        | Yes | 258  | 22.6 |
|                                                                                                                                                                                             | No  | 886  | 77.4 |
| P3: Do you think that the government have the capacity to provide free vaccine to the entire population?                                                                                    | Yes | 892  | 78.0 |
|                                                                                                                                                                                             | No  | 252  | 22.0 |
| P4: Do you think COVID-19 vaccine can be made available at an affordable and acceptable price by the private sector?                                                                        | Yes | 876  | 76.6 |
|                                                                                                                                                                                             | No  | 268  | 23.4 |
| P5: Do you think that certain population e.g. older citizens and healthcare professionals, should be given priority in administering COVID-19 vaccination?                                  | Yes | 1094 | 95.6 |
|                                                                                                                                                                                             | No  | 50   | 4.4  |
| P6: Do you think that the vaccination of general population should be started only after ensuring complete vaccination of priority groups e.g. older citizens and healthcare professionals? | Yes | 1113 | 97.3 |
|                                                                                                                                                                                             | No  | 31   | 2.7  |
| P7: Do you think that the country should resume normal life as soon as the vaccination is started?                                                                                          | Yes | 716  | 62.6 |
|                                                                                                                                                                                             | No  | 428  | 37.4 |
| W: Do you have willingness to get COVID-19 vaccine?                                                                                                                                         | Yes | 588  | 51.4 |
|                                                                                                                                                                                             | No  | 556  | 48.6 |

\*K represents knowledge-based questions; P represents perception-based questions; W represents willingness-related questions.
